# Supplementary material for: Are sEMG Parameters Indicative of PAP/PAPE, in Terms of Twitch Potentiation and Voluntary Performance? - A Systematic Review
Source: Preprints.org preprint supplement (doi:10.20944/preprints202405.0247.v1), 2024-05-06
Supplement: Supplementary file 1 [file supplementary]

## Sheet: Review Matrix
Identified records from Pubmed and Included in this review				Comments
Author(s), Year Published, Title	Journal	Purpose	#
Authors: Barnes MJ, Petterson A, Cochrane DJ Year: 2017 Title: Effects of different warm-up modalities on power output during the high pull.	Journal of Sports Sciences	The purpose of this study was to compared the effects of six warm-up modalities on peak power output (PPO) during the high-pull exercise.	3 of 9	This is where I first found this study. Later I found two duplicates; one on Scopus (#66 of 83) and Web of Science (#60 of 106) respectively.
Authors: Scott DJ, Ditroilo M, Marshall P Year: 2018 Title: Effect of Accommodating Resistance on the Postactivation Potentiation Response in Rugby League Players	Journal of Strength and Conditioning Research	The aim of this study was to examined the postactivation potentiation (PAP) response of 2 conditioning activities (CA), the hex bar deadlift and back squat, combined with accommodating resistance	4 of 9	This is where I first found this study. Later I aslo found it on Web of Science (#28 of 106)
Authors: Mina MA, Blazevich AJ, Tsatalas T, Giakas G, Seitz LB, Kay AD. Year: 2018 Title: Variable, but not free-weight, resistance back squat exercise potentiates jump performance following a comprehensive task-specific warm-up	Scandinavian Journal of Medicine & Science in Sports	The objective was to compare the influence of free‐weight resistance (FWR) and variable resistance (VR; imposed through elastic bands) squat exercises following a task‐specific comprehensive warm‐up on subsequent CMJ performance at different post‐conditioning time points (ie, 30 seconds, 4 minutes, 8 minutes, and 12 minutes).	5 of 9	This is where I first found this study. Later I aslo found a duplicate on Web of Science (#84 of 106).
Identified records from Web of Science and Included in this review				Comments
Author(s), Year Published, Title	Journal	Purpose	#
Authors: Johnson, M; Baudin, P; Ley, AL; Collins, DF Year: 2019 Title: A Warm Up Routine That Incorporates A Plyometric Protocol Potentiates The Force-Generating Capacity of the Quadricpes Muscles	Journal of Strength and Conditioning Research	The purpose of this study was to investigate whether a warm-up routine that incorporates drop jumps, induces PAP, and if so, assess the magnitude and time course of the induced PAP.	13 of 106	This is where I first found this study.
Authors: Seitz LB, Trajano GS, Dal Maso, F, Haff GG, Blazevich AJ. Year: 2015 Title: Postactivation potentiation during voluntary contractions after continued knee extensor task-specific practice	Applied Physiology, Nutrition, and Metabolism	The purpose of this study were to determine whether performing dynamic conditioning activities (CAs) contributes to PAP; to examine the potential confounding effects of CAs with different velocity, total contraction duration, and total work characteristics; and to gain a greater understanding of potential peripheral and central mechanisms underlying PAP.	15 of 106	This is where I first found this study.
Authors: Hodgson, MJ; Docherty, D and Zehr, EP Year: 2008 Title: Postactivation Potentiation of Force Is Independent of H-Reflex Excitability	International Journal of Sports Physiology and Performance	The aim of this study was to quantify the effectof postactivation potentiation on voluntary force production and spinal H-reflex excitability during explosive plantar flexion actions.	21 of 106	This is where I first found this study.
Authors: Miyamoto, N; Kanehisa,H; Fukunaga, T; Kawakami, Y Year: 2011 Title: Effect of postactivation potentiation on the maximal voluntary isokinetic concentric torque in humans	Journal of Strength and Conditioning Research	The objective was to examine examine the effect of a conditioning contraction on the voluntary dynamic performance over time, in terms of PAP and fatigue effect of conditioning contraction, through recording of twitch characteristics, voluntary torque, and electromyographic activities of the muscles involved.	29 of 106	This is where I first found this study.
Authors: Sotiropoulos, K; Smilios,l; Douda, H; Christou, M; Tokmakidis SP Year: 2014 Title: Contrast Loading: Power Output and Rest Interval Effects on Neuromuscular Performance	International Journal of Sports Physiology and Performance	The purpose of the this study was to examine the effects of rest-interval duration (1, 3, 5, 7, and 10 min) after the execution of jump squats with 3 different loads (70%, 100%, and 130% of the load that maximized mechanical-power output [Pmax] in a jump squat) on repeated-jump (RJ) height, mechanical power, and muscle electrical activity.	42 of 106	This is where I first found this study.
Authors: Tsoukos, A., Brown, L.E, Veligekas, P., Terzis, G., Bogdanis, G.C. Year: 2019 Title: Postactivation Potentiation of Bench Press Throw Performance Using Velocity-Based Conditioning Protocols with Low and Moderate Loads	Journal of Human Kinetics	The aim of this study was to examined the PAP response of 2 conditioning activities (CA), the hex bar deadlift and back squat, combined with accommodating resistance	47 of 106	This is where I first found this study. Later I aslo found a duplicate on Scopus (#49 of 83)
Authors: Folland, JP: Wakamatsu, T and Fimland, MS Year: 2008 Title: The influence of maximal isometric activity on twitch and H-reflex potentiation, and quadriceps femoris performance	European Journal of Applied Physiology	The objective was to describe the temporal profile of twitch potentiation (TP) and reflex potentiation (RP), in the quadriceps femoris and vastus medialis, respectively, following a 10 s isometric maximum voluntary contraction and investigate if these changes had a positive effect on neuromuscular performance. TP and RP were used to indicate the potential for PAP.	48 of 106	This is where I first found this study.
Authors: Mina MA, Blazevich AJ, Giakas G, Kay AD. Year: 2014 Title: Influence of variable resistance loading on subsequent free weight maximal back squat performance.	Journal of Strength and Conditioning Research	The objective was to examine the influence of VR exercise using elastic bands during a warm-up squat exercise on subsequent free-weight squat performance.	49 of 106	This is where I first found this study.
Authors: Sun, DP and Yang, IL Year: 2023 Title: Semi-Squat Exercises with Varying Levels of Arterial Occlusion Pressure during Blood Flow Restriction Training Induce a Post-Activation Performance Enhancement and Improve Vertical Height Jump in Female Football Players	Journal of Sports Science and Medicine	The purpose with this study was to examine the PAPE of low-intensity semi-squat exercises with varying pressure BFRT on vertical height jump perfor- mance. Twelve elite athletes from the Shaanxi Province women’s football team volunteered to participate in this study for 4 weeks.	73 of 106	This is where I first found this study. Later I aslo found a duplicate on Scopus (#16 of 83)
Authors: Zagatto AM; Claus GM; Dutra YM; de Poli RA; Lopes V.HF; Goodall S; Loturco I. & Boullosa D. Year: 2022 Title: Drop jumps versus sled towing and their effects on repeated sprint ability in young basketball players.	BMC Sports Science, Medicine and Rehabilitation	The aim of the investigation was to compare the occurrence of post-activation performance enhancement (PAPE) after drop jumps, or heavy sled towing, and the subsequent effect on repeated sprint ability (RSA).	75 of 106	This is where I first found this study.
Authors: Mina MA, Blazevich AJ, Giakas G, Seitz LB, Kay AD. Year: 2016 Title: Chain-loaded variable resistance warm-up improves tree-weight maximal back squat performance	European Journal of Sport Science,	TheC18 purpose of the present study was to examine the influence of another form of variable resistance (i.e. chain loaded resistance) during a warm-up on subsequent free-weight 1-RM back squat performance compared to free-weight resistance alone.	83 of 106	This is where I first found this study.
Authors: Tsoukos, A., Brown, L.E, Veligekas, P., Terzis, G., Bogdanis, G.C. Year: 2021 Title: Potentiation of Bench Press Throw Performance Using a Heavy Load and Velocity-Based Repetition Control	Journal of Strength and Conditioning Research	The aim of this study was to examine the acute effects of a heavy load bench press exercise on subsequent bench press throw and sEMG the prime mover muscles, using movement velocity control.	89 of 106	This is where I first found this study.
